# Supplementary material for: Overexpression of UTX promotes tumor progression in Oral tongue squamous cell carcinoma patients receiving surgical resection: a case control study
Source: PubMed Central journal article supplement (PMC8408955; doi:10.1186/s12885-021-08726-3), 2021-09-01
Supplement: 12885_2021_8726_MOESM1_ESM.pdf [file 12885_2021_8726_MOESM1_ESM.pdf]

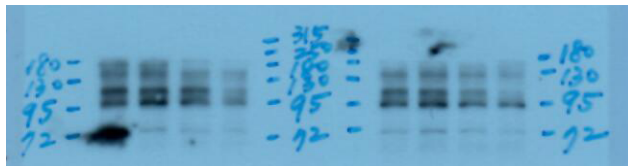

UTX

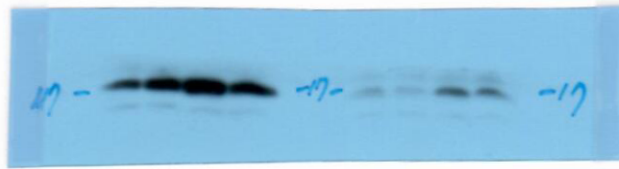

H3K27me3

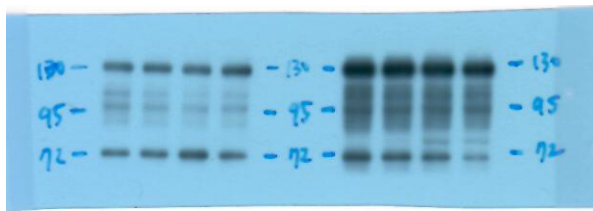

E-cadherin

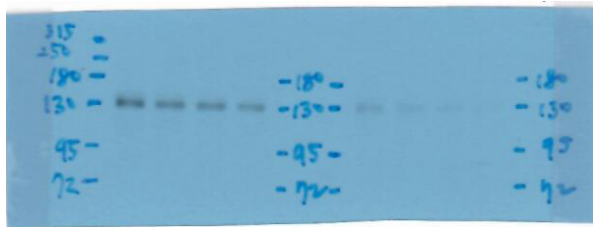

N-cadherin

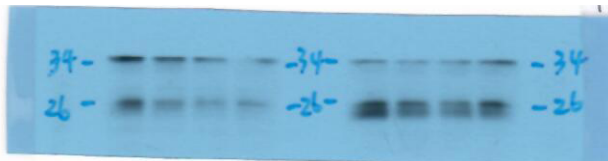

Twist1

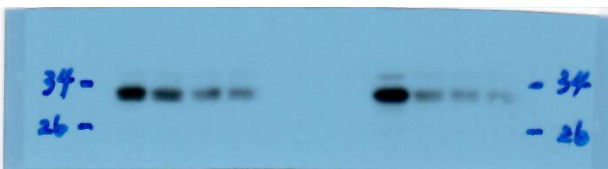

CDK4

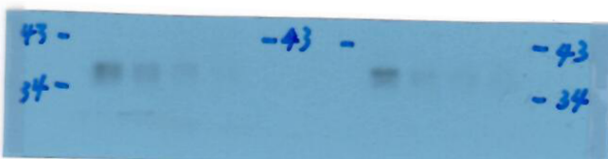

Cyclin D1

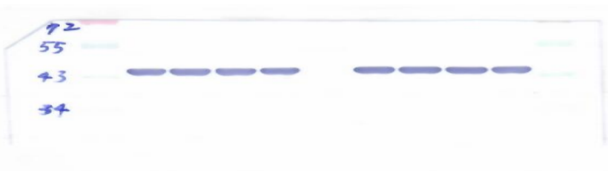

actin
